# Supplementary material for: Fabrication of syntactic foam fillers via integrated on/off-chip microfluidic methods for optimized geopolymer composites
Source: Royal Society of Chemistry journal article supplement (doi:10.1039/d1lc00901j), 2022-01-01
Supplement: d1lc00901j1.pdf [file d1lc00901j1.pdf]

Supporting Information for

## Fabrication of Syntactic Foam Fillers via Integrated on/off-Chip Microfluidic Methods for Optimized Geopolymer Composites

*Hao Wu<sup>a,c</sup>, Yukun Ren<sup>a,b\*</sup>, Tianyi Jiang<sup>a</sup>, Wenlong Wu<sup>a</sup>, Yang Lu<sup>c,d</sup>, Hongyuan, Jiang<sup>a\*</sup>*

<sup>a</sup>School of Mechatronics Engineering, Harbin Institute of Technology, 150001, Harbin, China

<sup>b</sup>State Key Laboratory of Robotics and System, Harbin Institute of Technology, 150001, Harbin, China

<sup>c</sup>Department of Mechanical Engineering, City University of Hong Kong, 999077, Kowloon, Hong Kong SAR, China

<sup>d</sup>Nano-Manufacturing Laboratory (NML), Shenzhen Research Institute of City University of Hong Kong, 518057, Shenzhen, China

\*Corresponding author. Email address: [rykhit@hit.edu.cn](mailto:rykhit@hit.edu.cn), [jhy\\_hit@hit.edu.cn](mailto:jhy_hit@hit.edu.cn)

**Keywords:** Syntactic foam, Fillers, Droplet microfluidics, Osmotic regulation, Geopolymer

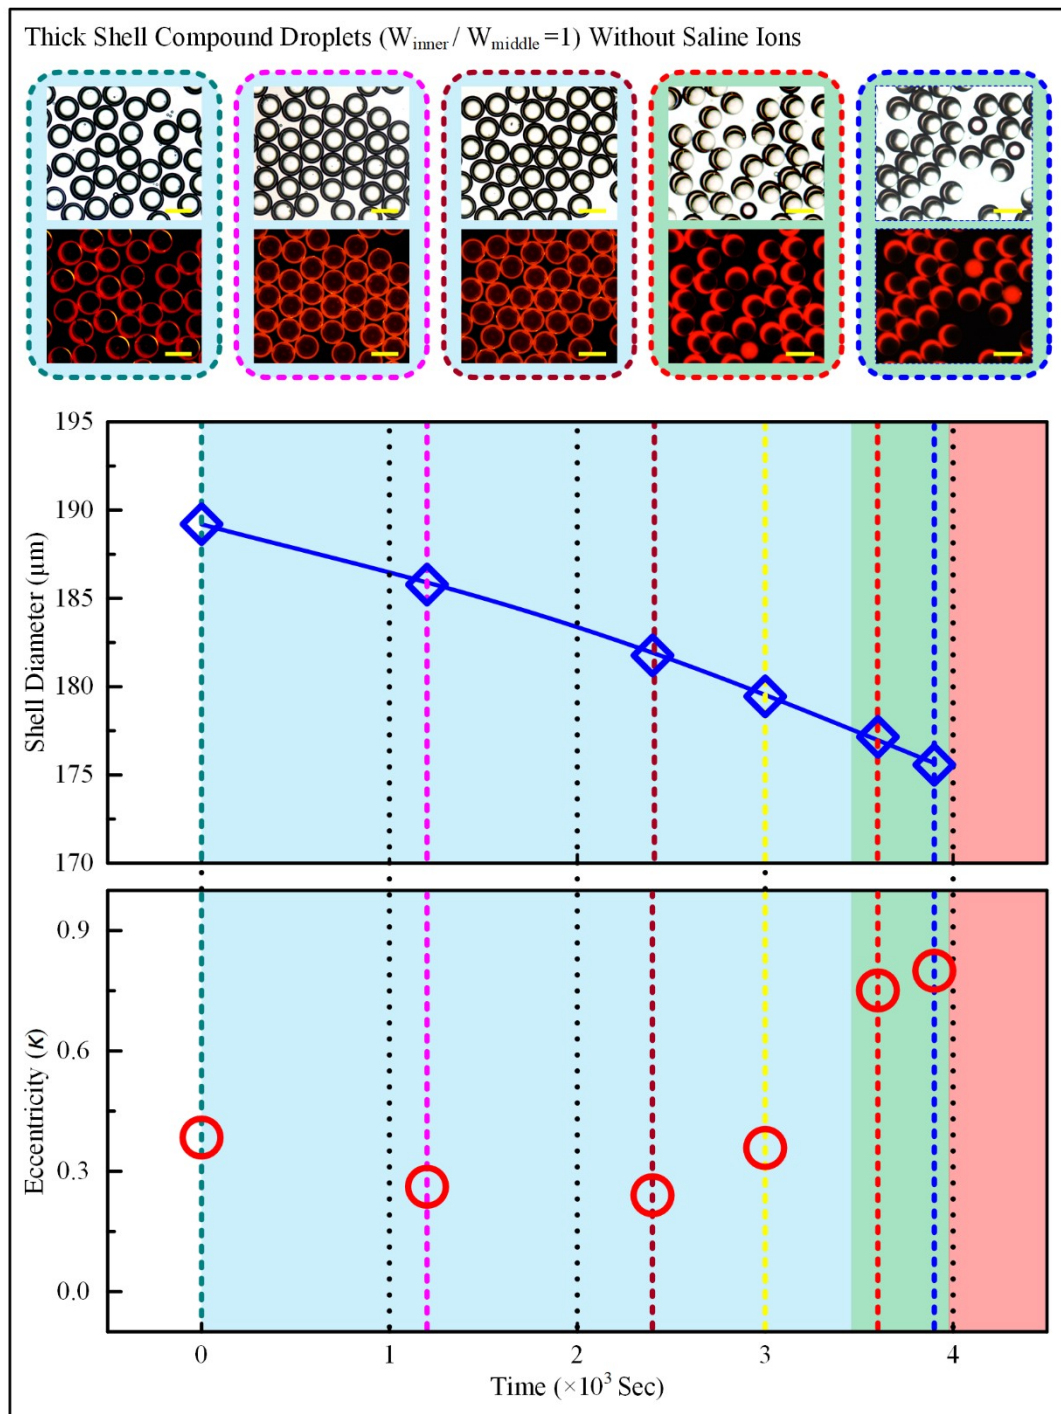

Figure. S1. Relationships between the parameters of droplets and the preservation time. The inset figures circled in dashed frames are optical/ fluorescent microscope images of droplets. Corresponding scale bars are  $200 \mu\text{m}$ .

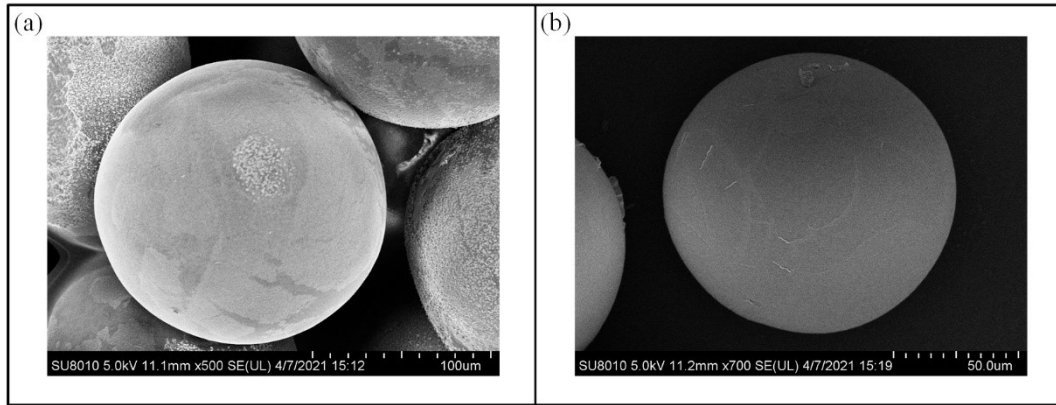

Figure. S2. (a) SEM image of the solidified droplets after photopolymerization. (b) SEM image of the solidified droplets after calcination.

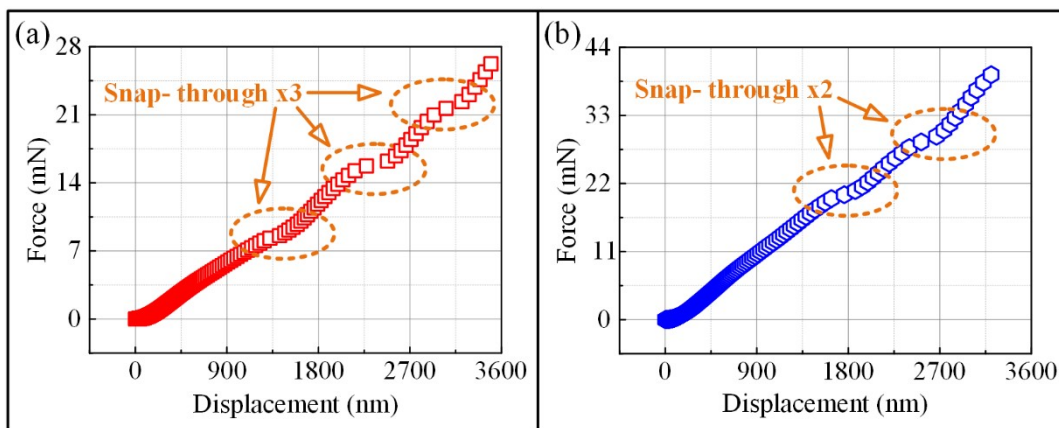

Figure. S3. (a) Nanoindentation results of SFF with heterogeneous shell thickness. (b) Nanoindentation results of SFF with homogeneous shell thickness.

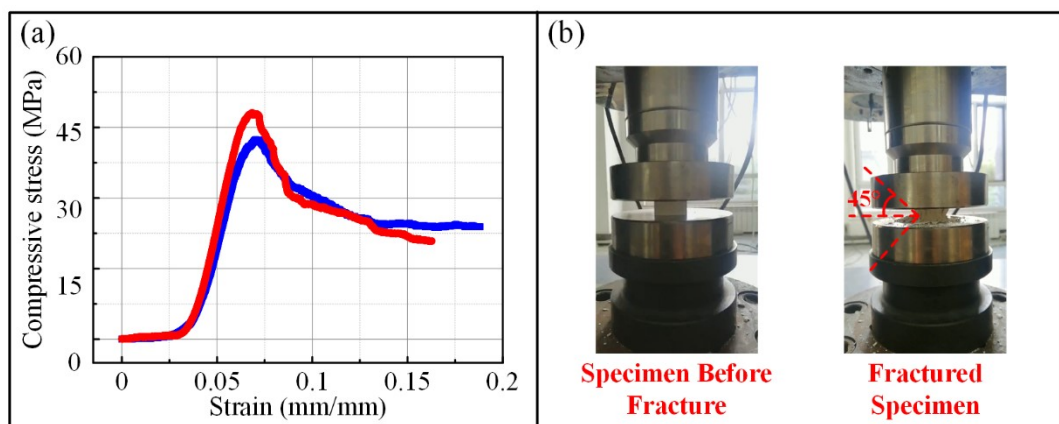

Figure. S4. (a) Typical compression stress-strain curves of the GSFs containing 40% volume fraction of SFFs. (b) Snapshots of the same specimen during compression

experiment.

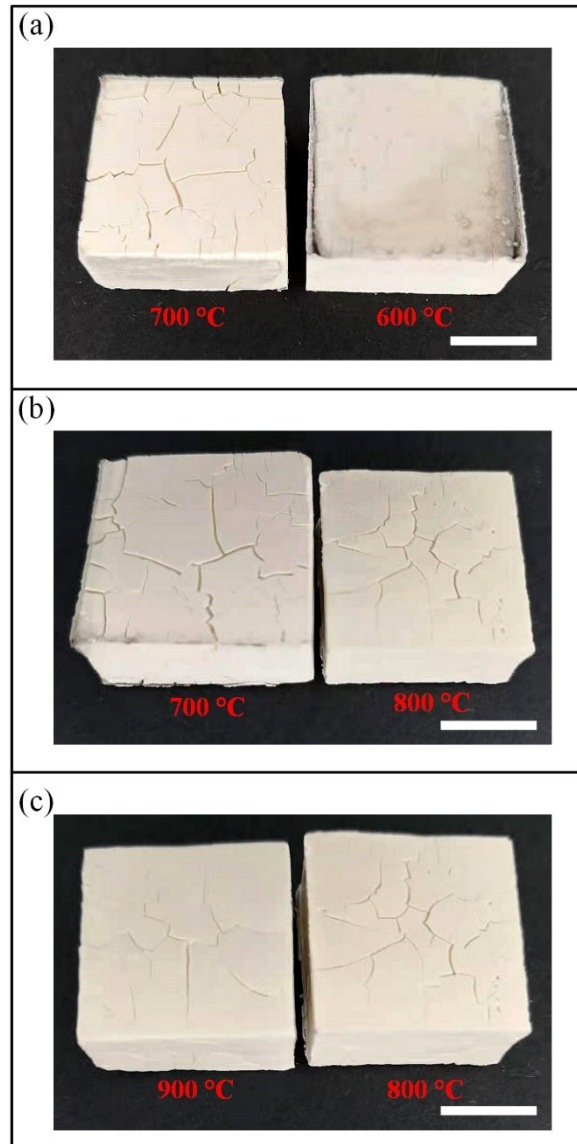

Figure. S5. Dimension comparison of GSFs after exposure to different temperatures.

Scale bars are 10 cm.

### Supporting Videos

**Movie. S1.** Part of the recorded compression process of geopolymer based syntactic foam.

**Movie. S2.** Combustion experiment of epoxy resin.

**Movie. S3.** Combustion experiment of geopolymer based syntactic foam.
